# Supplementary material for: The bi-functional mechanism of CH4 dry reforming over a Ni–CaO–ZrO2 catalyst: further evidence via the identification of the active sites and kinetic studies
Source: Royal Society of Chemistry journal article supplement (doi:10.1039/c3cy00153a), 2013-01-01
Supplement: c3cy00153a.pdf [file c3cy00153a.pdf]

Supporting information for

**Bi-functional Mechanism of CH<sub>4</sub> Dry Reforming over a  
Ni-CaO-ZrO<sub>2</sub> Catalyst: Further Evidence via Active Sites**

**Identification and Kinetic Studies**

*Changzhen Wang<sup>1,2</sup>, Nannan Sun<sup>1</sup>, Min Kang<sup>1,2</sup>, Xia Wen<sup>3</sup>, Ning Zhao<sup>1</sup>, Fukui Xiao<sup>1</sup>,  
Wei Wei<sup>3\*</sup>, Tiejun Zhao<sup>4</sup>, Yuhan Sun<sup>4\*</sup>*

<sup>1</sup> State Key Laboratory of Coal Conversion, Institute of Coal Chemistry, Chinese Academy of Sciences, China

<sup>2</sup> University of Chinese Academy of Sciences, China

<sup>3</sup> Center for Greenhouse Gas and Environmental Engineering, Shanghai Advanced Research Institute, Chinese Academy of Sciences, China

<sup>4</sup> Low Carbon Conversion Center, Shanghai Advanced Research Institute, Chinese Academy of Sciences, China

\*Corresponding author. Tel/Fax: +86-351-4049612

E-mail address: weiwei@sxicc.ac.cn; yhsun@sxicc.ac.cn.

*SI 1 Ni-carbon compound diffractions on similar Ni-CaO-ZrO<sub>2</sub> catalysts with different SMSI effect.*

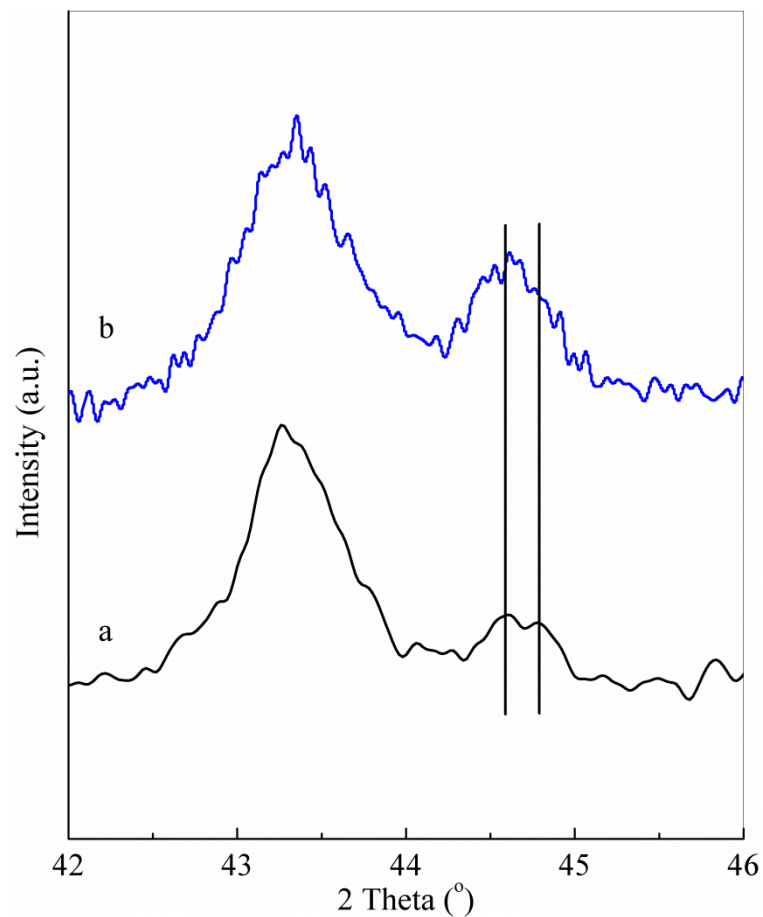

**Fig. S1.** Fine scanning XRD patterns of spent Ni-CaO-ZrO<sub>2</sub> catalyst prepared with different method at 42-46°.

a) Ni-CaO-ZrO<sub>2</sub> with fine SMSI effect, b) Ni-CaO-ZrO<sub>2</sub> with less SMSI effect.

Fig. S1 shows that the diffraction of the non-stoichiometric Ni-carbon compound cannot be clearly distinguished in a Ni-CaO-ZrO<sub>2</sub> catalyst with less SMSI.

### *SI2 Stability test*

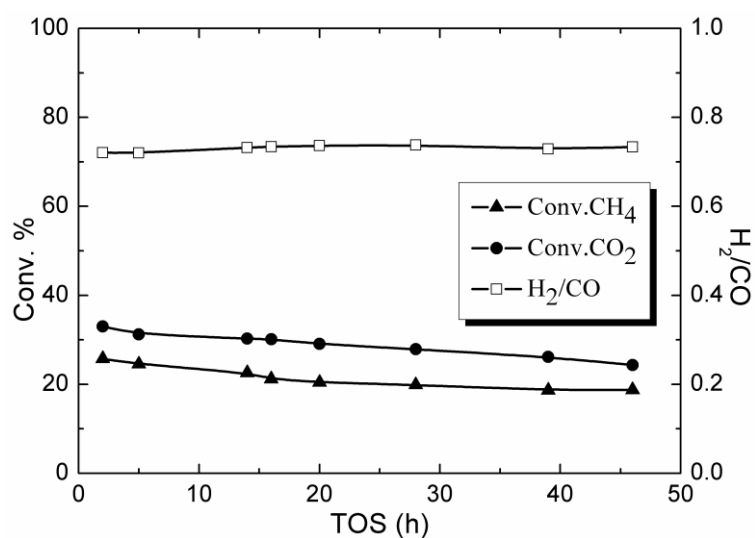

**Fig. S2.** Stability test under differential condition  
(750 °C, P<sub>CO<sub>2</sub></sub>:P<sub>CH<sub>4</sub></sub>: P<sub>Ar</sub> =1:1:1, GHSV=1200 L g<sup>-1</sup> h<sup>-1</sup>)

**Fig. S2** shows the CH<sub>4</sub> and CO<sub>2</sub> conversions versus time on stream under *differential* conditions. They are significantly lower than thermodynamic equilibrium values due to shorter contact time. The conversion of CH<sub>4</sub> and CO<sub>2</sub> decreased slightly in the first four hours and remain stable for 45 h. Consequently, the kinetic data were taken after the reaction proceeds for at least 4 h to ensure stable performance of the catalyst.

### S13 Mass transport effects

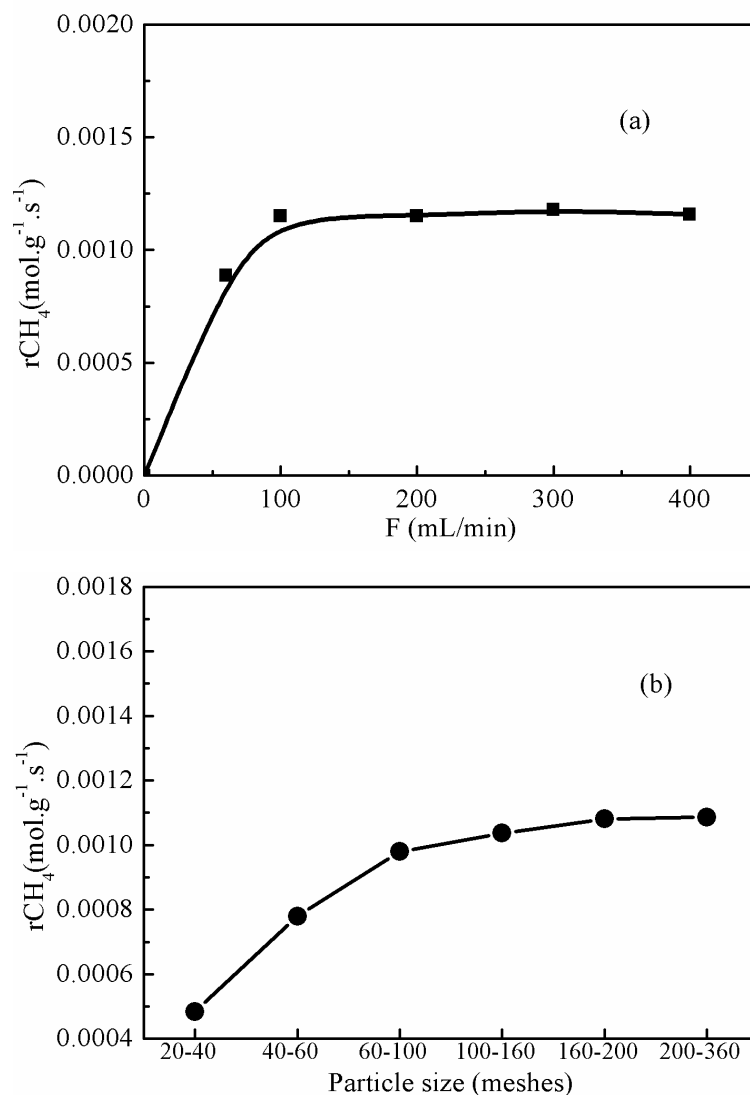

**Figure S3.** Determination of kinetic regime

(a) Effect of feed flow rate at constant  $W/F$  (0.003 g s mL<sup>-1</sup>)

(b) Effect of particle size at constant  $W/F$  ratio (0.003 g s mL<sup>-1</sup>)

The effect of external mass transfer limitation was studied experimentally with a fixed residence time through a variation of feed velocity, and possible effect of internal diffusion limitation was investigated by carrying out the reactions with a flow rate of 300 mL/min under a constant  $W/F$  ratio (0.003 g s mL<sup>-1</sup>) using catalyst particles of diameters from 20 to 300 meshes. The results showed in Fig. S3 suggests that the kinetic data was collected without any diffusion influence.

### SI4 Parity chart and optimized kinetic parameters

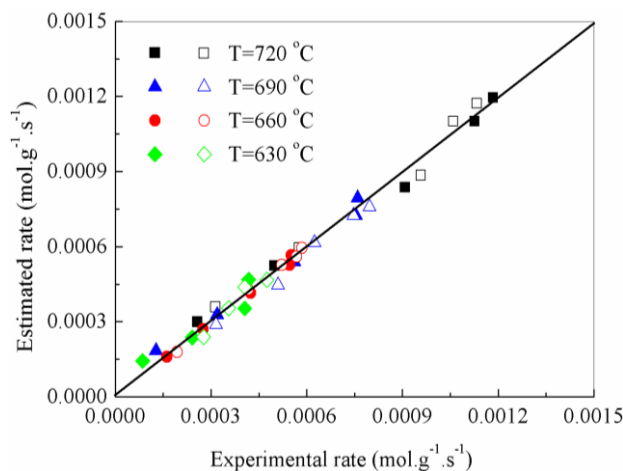

**Fig. S4.** Parity chart comparing between predicted and measured reaction rate

The simulation and experimental results are given in the parity chart (Fig. S4), which compares the experimental conversions of methane with those predicted by solving the kinetic model Eqn. (10). It shows a very good correlation between the calculated and experimental reaction rates obtained at different temperatures.

In Eqn. (10),  $K_{\text{CH}_4}$  is the equilibrium constant of methane adsorption and  $k_{\text{CH}_4}$  is the rate constant of the methane cracking. The two constants could not be determined individually but if we considered the methane adsorption and cracking together, we could get a simple parameter  $k'_{\text{CH}_4}$ , where  $k'_{\text{CH}_4} = K_{\text{CH}_4} k_{\text{CH}_4}$  (11), and might represent the apparent rate constant of the decomposition of methane on the metal.

The optimized kinetic parameters determined with this model were provided in Table 3. The parameters in Table 3 were related at all temperatures by the Arrhenius and van't Hoff equations, so the rate constants of Eqn. 8 and 11 and equilibrium constant of Eqn. (7) have the following forms for the Ni-CaO-ZrO<sub>2</sub> catalyst system:

$$k = 1.57 \times 10^5 \times \exp(-14720.9/T) [\text{mol g}^{-1} \text{s}^{-1}] \quad (12)$$

$$k'_{\text{CH}_4} = 1.01 \times \exp(-9217.5/T) [\text{mol g}^{-1} \text{s}^{-1} \text{kPa}^{-1}] \quad (13)$$

$$K_{\text{CO}_2} = 2.73 \times 10^{-6} \times \exp(8161.4/T) [\text{kPa}^{-1}] \quad (14)$$
